# Supplementary material for: Sumoylation-deficient Prdx6 repairs aberrant Sumoylation-mediated Sp1 dysregulation-dependent Prdx6 repression and cell injury in aging and oxidative stress
Source: publisher site journal article supplement (doi:10.18632/aging.101547), 2018-09-12
Supplement: Supplementary file [file aging-v10i9-101547-supplementary-material-SD1.pdf]

**SUPPLEMENTARY FIGURES**

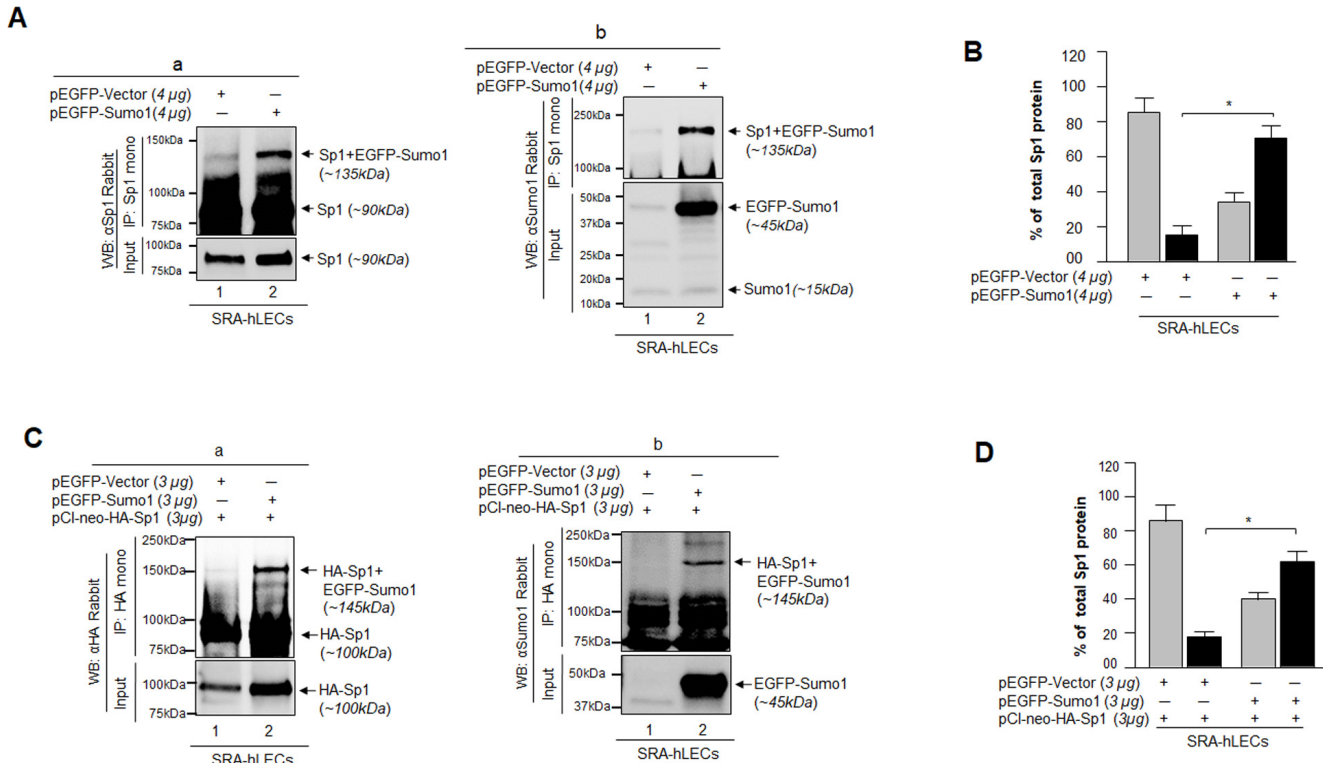

**Supplementary Figure 1. Intrinsic or extrinsic Sp1 was Sumoylated in LECs *in vivo*.** (A) Intrinsic Sp1 protein is a substrate for Sumo1 *in vivo*. SRA-hLECs ( $1 \times 10^6$ ) were overexpressed with pEGFP-Vector or pEGFP-Sumo1. Cells transfected with pEGFP-Vector served as control (Aa and Ab, Lane 1). 48h after transfection, nuclear extracts were prepared and subjected to immunoprecipitation (IP) using anti-Sp1 monoclonal antibody. Input and IP samples were resolved on 4–20% SDS-PAGE and immunoblotted with anti-Sp1 (Aa) or anti-Sumo1 (Ab) rabbit polyclonal antibodies and visualized as described in Materials and Methods. IP experiments revealed the presence of two bands with Sp1 antibody: ~90kDa (unSumoylated endogenous Sp1), and ~135kDa (endogenous Sp1 Sumoylated by pEGFP-Sumo1), indicating that Sp1 may contain a single site for Sumo1 protein. (B) Sensitive Sp1 Sandwich/Sumo1-ELISA assays validated that intrinsic Sp1 was Sumoylated, and showed that a fraction of endogenous Sp1 was present in Sumoylated form. SRA-hLECs were transfected with pEGFP-vector or pEGFP-Sumo1. 48h later nuclear extracts were prepared and submitted to Sp1 sandwich/Sumo1-ELISA assays to check the total Sp1 (IP: Sp1) protein and Sumoylated Sp1 (IP: Sp1) protein. Sumoylated Sp1 protein was subtracted from total Sp1 protein, presenting as deSumoylated Sp1 (gray bars) and Sumoylated Sp1 (black bars) forms. The data represent mean  $\pm$  SD from three independent experiments (\* $p < 0.001$ ). (C) SRA-hLECs ( $1.2 \times 10^6$ ) were cotransfected with pCl-neo-HA-Sp1 (3μg) along with pEGFP-Sumo1 (3μg) or pEGFP-vector (3μg). After 48h, total cell lysates were prepared and subjected to immunoprecipitation (IP) using anti-HA monoclonal or control IgG antibodies. 10% Input and IP samples were resolved onto 4-20% SDS-PAGE and immunoblotted with anti-HA (Ca) and anti-Sumo1 (Cb) rabbit polyclonal antibodies. Sumoylated band was visualized with both antibodies at ~145kDa (pEGFP-Sumo1 [~45kDa] plus pHA-Sp1 [~100kDa]; lane 2). In input, HA-Sp1 was seen with anti-HA antibody and EGFP-Sumo1 with anti-Sumo1 antibody. (D) Sensitive Sp1 sandwich/Sumo1-ELISA assays validated that extrinsic Sp1 was Sumoylated. SRA-hLECs were transfected with pEGFP-vector plus pHA-Sp1 or pEGFP-Sumo1 plus pHA-Sp1. Total cell lysates were prepared and used to perform Sp1 sandwich/Sumo1-ELISA. Sumoylated Sp1 protein (IP: HA) was subtracted from total Sp1 (IP: HA) protein, presenting as deSumoylated Sp1 (gray bars) and Sumoylated (black bars) forms. The data represent the mean  $\pm$  SD of three independent experiments; \* $p < 0.001$ .

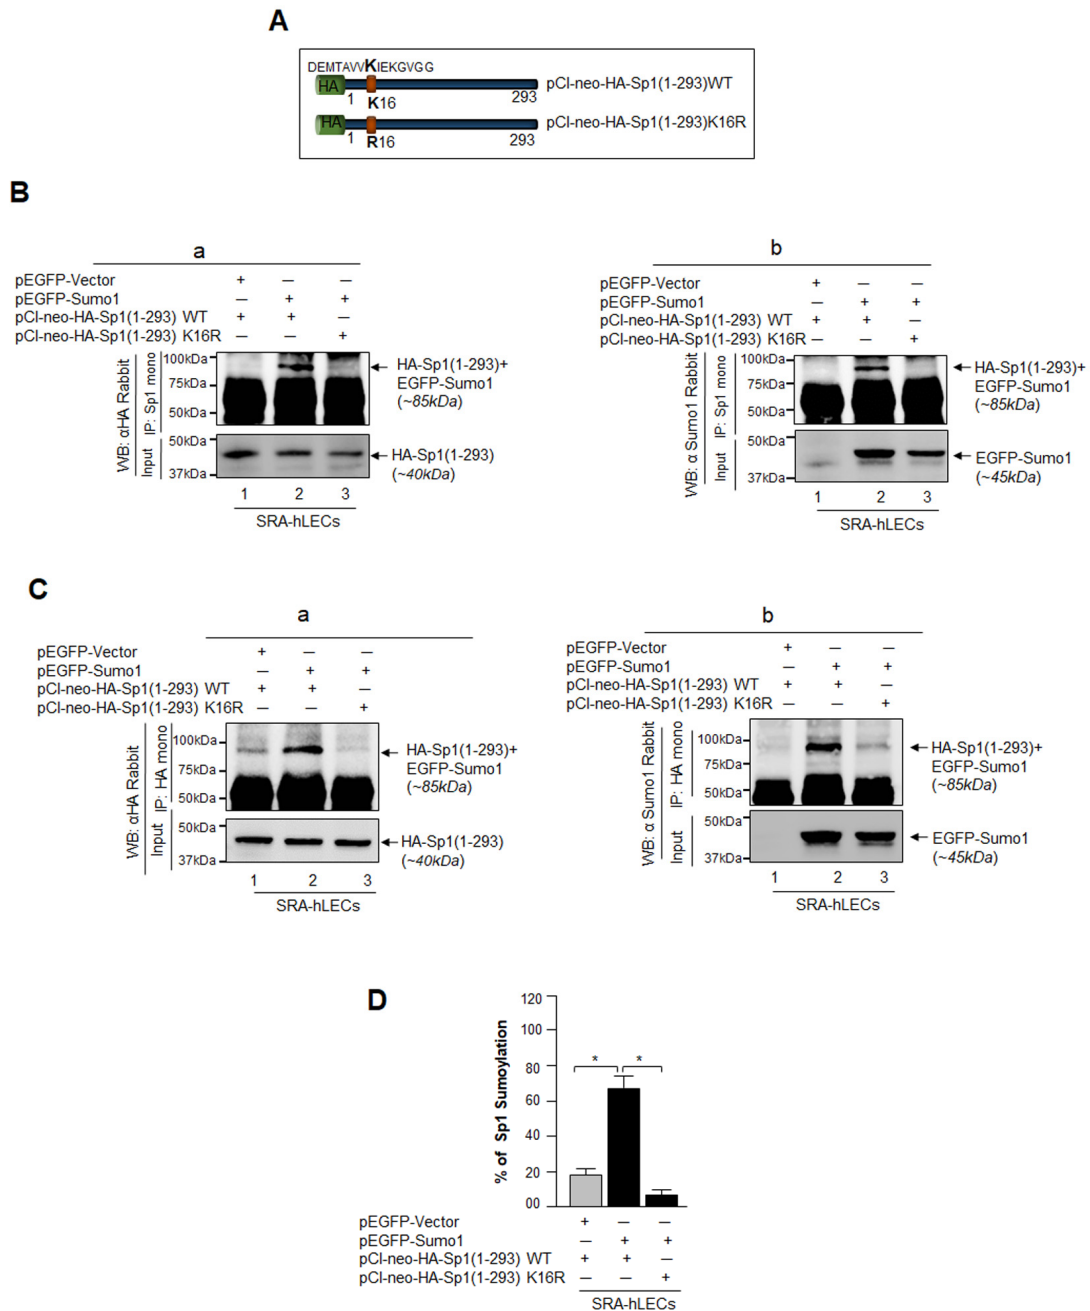

**Supplementary Figure 2. Sumo1 was conjugated to lysine K16 of Sp1 *in vivo*.** (A) Top panel, a diagrammatic illustration of Sp1 deletion construct with 293aa, pCl-neo-HA-Sp1(1-293) WT, Sp1 Full construct pCl-neo-HA-Sp1 and their mutant (at K16 to R16) plasmids. (B and C) SRA-hLECs ( $1.2 \times 10^6$ ) were cotransfected with pCl-neo-HA-Sp1 (1-293) WT (3 $\mu$ g) plus pEGFP-Vector (3 $\mu$ g) or pCl-neo-HA-Sp1 (1-293) WT (3 $\mu$ g) plus pEGFP-Sumo1 (3 $\mu$ g) or pCl-neo-HA-Sp1 (1-293) K16R (3 $\mu$ g) plus pEGFP-Sumo1 (3 $\mu$ g). 48h later, cellular extracts were prepared and subjected to IP using anti-Sp1 (B) or anti-HA (C) monoclonal antibodies and immunoblotted as indicated. Single exogenous Sumoylated band was observed at ~85kDa [~40kDa, pCl-neo-HA-Sp1 (1-293) WT + pEGFP-Sumo1 (~45kDa)] in pCl-neo-HA-Sp1 (1-293) WT plus pEGFP-Sumo1 transfected (B and C, lane 2) cells with anti-HA and anti-Sumo1 rabbit polyclonal antibodies. No Sumoylated bands were detected in pCl-neo-HA-Sp1(1-293)WT plus pEGFP-Vector (B and C, Lane 1) and pCl-neo-HA-Sp1(1-293) K16R (B and C, Lane 3) transfected cells. (D) An *in vivo* Sumoylation ELISA assay was done according to the manufacturer's protocol (EpiQuik<sup>TM</sup>). SRA-hLECs were transfected with pCl-neo-HA-Sp1(1-293)WT plus pEGFP-Vector or pCl-neo-HA-Sp1(1-293)WT plus pEGFP-Sumo1 or pCl-neo-HA-Sp1(1-293)K16R plus pEGFP-Sumo1. 48h later, total cell lysates were prepared and processed for Sumo1-ELISA assay to measure Sumoylated form of Sp1. Data represent mean  $\pm$  SD from three independent experiments. pCl-neo-HA-Sp1 (1-293)WT plus pEGFP-Vector vs pCl-neo-HA-Sp1(1-293) WT plus pEGFP-Sumo1 vs pCl-neo-HA-Sp1(1-293) K16R plus pEGFP-Sumo1 (\* $p < 0.001$ ).
